# Supplementary material for: Study on Adsorption Performance of Benzoic Acid in Cyclocarya paliurus Extract by Ethyl Cellulose Microspheres
Source: MDPI journal article supplement (doi:10.3390/chemistry3040081), 2021-10-01
Supplement: s1 [file s1]

## Supplementary Material

# Study on Adsorption Performance of Benzoic Acid in *Cyclocarya paliurus* Extract by Ethyl Cellulose Microspheres

Yamin Zhao <sup>1,2,3,\*</sup>, Lujun Zhang <sup>1,2,3</sup>, Xiaoxue Zhai <sup>1,2,3</sup>, Qian Liu <sup>1,2,3</sup>, Lebing Sun <sup>1,2,3</sup>, Mengshi Liu <sup>1,2,3</sup>, Lili An <sup>1,2,3</sup>, Liang Xian <sup>1,2,3</sup>, Ping Zhang <sup>1,2,3</sup> and Lihua Chen <sup>1,2,3</sup>

<sup>1</sup> School of Chemical Engineering, Northwest Minzu University, Lanzhou 730030, China; a2848695227@163.com (L.Z.); zxx19981025@126.com (X.Z.); lq1664521416@163.com (Q.L.); slebing72118@163.com (L.S.); xbmz\_zhaoym@sina.com (M.L.); slb15095398821@163.com (L.A.); lxian@xbmu.edu.cn (L.X.); gszhangping@126.com (P.Z.); clh@xbmu.edu.cn (L.C.)

<sup>2</sup> Key Laboratory for Utility of Environment-Friendly Composite Materials and Biomass in Universities of Gansu Province, Lanzhou 730030, China

<sup>3</sup> Key Laboratory of Environment-Friendly Composite Materials of the State Ethnic Affairs Commission, Lanzhou 730030, China

\* Correspondence: zhaoym\_xbmz@sina.com

## Determination of the peak time of benzoic acid

After a single-needle injection test on a standard sample by HPLC, it was found that the peak time of benzoic acid is about 16.5 min, as shown in Scheme S1.

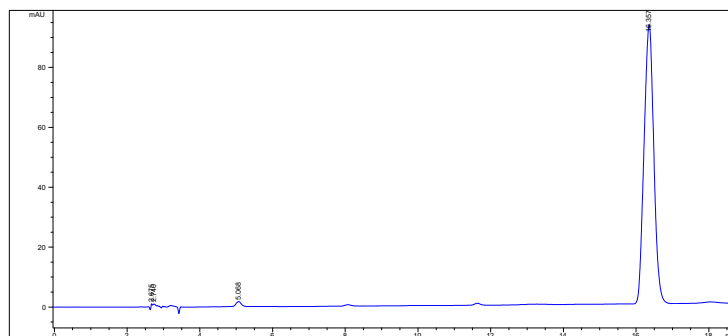

Scheme S1. Chromatogram of benzoic acid standard
